# Supplementary material for: Strategy of regulating the electrophilic/nucleophilic ability by ionic ratio in poly(ionic liquid)s to control the coupling reaction of epoxide
Source: Royal Society of Chemistry journal article supplement (doi:10.1039/d1cy01024g), 2021-01-01
Supplement: d1cy01024g1.pdf [file d1cy01024g1.pdf]

## Supplementary information

### **Strategy of regulating electrophilic/nucleophilic ability by ionic ratio in poly(ionic liquid)s to control the coupling reaction of epoxide**

*Shengxin Chen<sup>a,b</sup>, Ran An<sup>b</sup>, Yingwei Li<sup>b,c</sup>, Yuting Zhu<sup>b,d</sup>, XinBao Zhu<sup>d</sup>, Ruixia Liu<sup>\*b,c</sup> and*

*Xingang Li<sup>\*a</sup>*

a. School of Chemical Engineering and Technology, National Engineering Research Center of Distillation Technology, Tianjin University, Tianjin 300072, P. R. China

b. Beijing Key Laboratory of Ionic Liquids Clean Process, CAS Key Laboratory of Green Process and Engineering, State Key Laboratory of Multiphase Complex Systems, Institute of Process Engineering, Innovation Academy for Green Manufacture, CAS, Beijing 100190, P. R. China

c. School of Chemical engineering, University of Chinese Academy of Sciences, Beijing 100049, PR China

d. College of Chemical Engineering, Nanjing Forestry University, Nanjing, 210037, P. R. China

### FTIR spectra of PVIM and PIL-ACs

PVIM and PIL-ACs were measured by Thermo Fisher Nicolet FT-IR instrument at room temperature. In PVIM, the FTIR spectra showed the characteristic bands of imidazole ring at  $3112\text{ cm}^{-1}$  (C-H bond stretch),  $1643\text{ cm}^{-1}$  (C=C bond stretch) and  $1500\text{ cm}^{-1}$  (C=N bond stretch) which was consisted with the previous research. The characteristic bands of PIL-ACs were consisted with PIL-Brs which showed a new peak at  $1705\text{ cm}^{-1}$  represent the C-O bond stretch from anion species.

### NMR of PVIM

PVIM could be dissolved in  $\text{D}_2\text{O}$ , thus, PVIM were measured in  $\text{D}_2\text{O}$  solution using a 600 MHz AVANCE III NMR spectrometer at room temperature. It showed the signals appeared between 1.8 and 3.6 was corresponding to the backbone, and those showed at around 6.4 and 7.0 ppm attributed to imidazole ring.

### TG of PIL-Brs

Thermogravimetry analysis of PIL-Brs was recorded on a NETZSCH STA 449C instrument under nitrogen atmosphere at a heating rate of  $10\text{ }^\circ\text{C}/\text{min}$ .

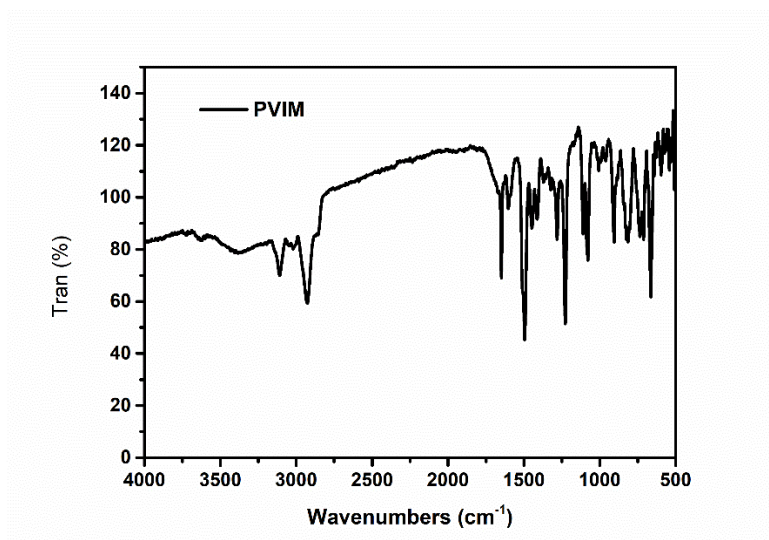

Figure S1: FTIR spectra of PVIM

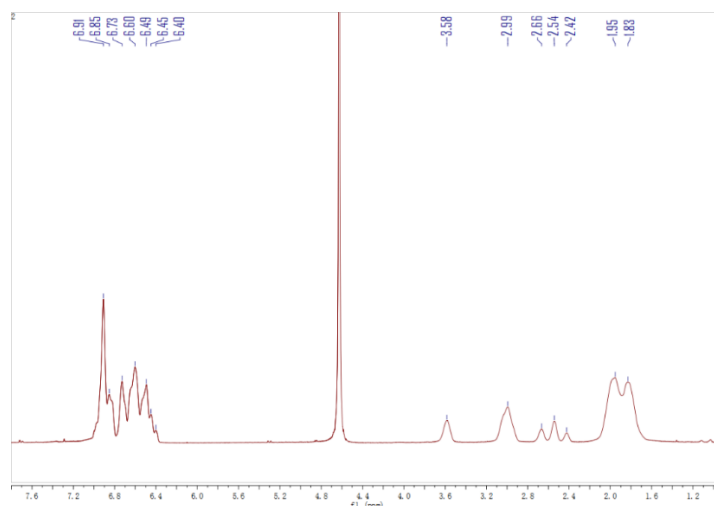

Figure S2: The full  $^1\text{H}$  NMR spectra of PVIM in  $\text{D}_2\text{O}$

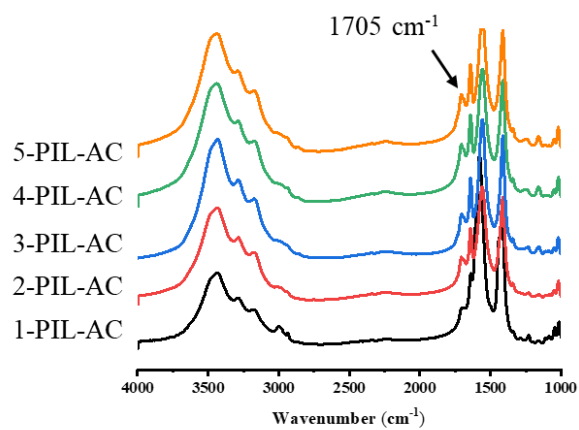

Figure S3: FTIR spectra of PIL-ACs from 4000  $\text{cm}^{-1}$  to 1000  $\text{cm}^{-1}$

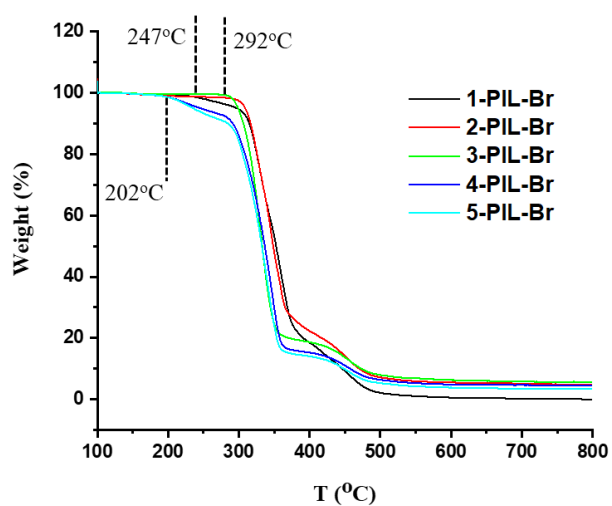

Figure S4: Thermogravimetry analysis of PIL-Brs ranging from 100  $^{\circ}\text{C}$  to 800  $^{\circ}\text{C}$
